# Supplementary material for: KCTD15 acts as an anti-tumor factor in colorectal cancer cells downstream of the demethylase FTO and the m6A reader YTHDF2
Source: PubMed Central journal article supplement (PMC10912199; doi:10.1038/s42003-024-05880-9), 2024-03-04
Supplement: 42003_2024_5880_MOESM1_ESM.pdf [file 42003_2024_5880_MOESM1_ESM.pdf]

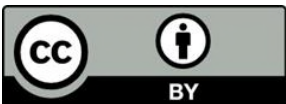

**Open Access** This file is licensed under a Creative Commons Attribution 4.0 International License, which permits use, sharing, adaptation, distribution and reproduction in any medium or format, as long as you give appropriate credit to the original author(s) and the source, provide a link to the Creative Commons license, and indicate if changes were made. In the cases where the authors are anonymous, such as is the case for the reports of anonymous peer reviewers, author attribution should be to 'Anonymous Referee' followed by a clear attribution to the source work. The images or other third party material in this file are included in the article's Creative Commons license, unless indicated otherwise in a credit line to the material. If material is not included in the article's Creative Commons license and your intended use is not permitted by statutory regulation or exceeds the permitted use, you will need to obtain permission directly from the copyright holder. To view a copy of this license, visit <http://creativecommons.org/licenses/by/4.0/>.

Reviewers' comments:

Reviewer #1 (Remarks to the Author):

In the manuscript of Zhang et al., the authors focus on the role of KCTD15 in the progression of colorectal cancer. They refer to the role of demethylase FTO mediated by m6A-YTHDF2 as regulators of KCTD15 mRNA levels in cancer cells. They also suggest that KCTD15 ability to inhibit CRC progression is due to its ability to increase the stability of p53 by acting on its acetylation levels.

The work is extremely interesting and clarifies the potential role of KCTD15 in carcinogenesis. The results shown support the hypotheses made by the authors. There are a few points that should be expanded and clarified to ensure the publication of the manuscript.

-I do not understand why the authors do not also use another CRC model system for the KCTD15 methylation and p53 stability analysis experiments. It would be appropriate, to corroborate the hypotheses made, to show some experiments done on HCT116, also on LoVo cells.

-It would be useful to understand whether cells over-expressing KCTD15 or silenced for KCTD15 alter their tumor aggressiveness, through specific experiments such as cell migration experiments. This is because reduced cellular aggressiveness could also support the hypothesis of KCTD15 as a therapeutic target in CRC.

-The authors also show that alterations in KCTD15 expression levels lead to the stabilization of p53 through the action of HDAC1. The authors should demonstrate whether KCTD15 is able to interact directly with p53 or with HDAC1.

Minor issues:

- Line 274. There is no reference to Figure 2D in the text.

- Line 308 It says "decreased", I guess the authors meant "Increased"

-Line 341. It says KCTD16, I guess they meant to write KCTD15.

Revise the English, some sentences are difficult to understand.

Reviewer #2 (Remarks to the Author):

In this paper, the authors claim that KCTD15 is regulated by demethylase FTA in an m6A-YTHDF2-dependent manner and exerts a tumor inhibiting role in CRC progression by increasing p53 stability. The data are interesting and a role for KCTD15 in CRC cells is clearly delineated by the authors. In particular, author's claim that KCTD15 overexpression attenuated cell proliferation in vitro and xenograft tumor growth in vivo is convincingly demonstrated.

Also, I find convincing the data regarding how m6A modification affects KCTD15 expression. Regarding the mechanism of action by KCTD15 which has been proposed, modulation of p53 by means of HDAC1 may be not the only mechanism responsible for tumor suppression, being HDAC1 also involved in modulation of the Hh pathway (by modulating Gli1 acetylation) and other targets, and it seems not fully demonstrated that p53 stabilization is the only mechanism involved in CRC antitumoral effect. I would not rule out other effects of KCTD15 on other pathways as well, which may contribute to the effect shown.

Some of the figures need improvements, especially with the addition of the appropriate controls.

On this regard, the authors should address the following:

1) The authors present in Figure 1 the DEGs. Among them, several hint (panel d and e), to a role of genes involved in muscle, muscle contraction, cardiomyocytes, cardiomyopathy. The authors should spend at least a few words discussing these findings.

2) I believe that, before focusing on KCTD15 alone, the authors should spend a few words elaborating what is known about kctd7.

3) Figure 2 Panel d: the authors should show HIC of tumor and the paired non tumoral tissue, as well, to better evaluate the level of KCTD15 expression.

4) Figure 4 Panel e, we should see also Ki67 protein levels in the WBs.

5) Figure 5:

Panel b, KCTD15 protein should be shown as well.

Panel c: is important to add a graph with the actual numbers of tunel positive cells.

Panel D the quality of the samples and of the staining is low (maybe adding in supplementary a couple more tumors would be helpful)

Panel e is not necessary, can be removed, does not add anything new.

6) Figure 6, panel F: misspelling of the word sequence

7) Figure 7 panel d: the protein levels of FTO and YTHDF1 should be shown.

8) Figure 8:

panel A: K15 protein is missing.

Panel b, p53 input is not shown

Panel c: to allow a better comparison, densitometry performed on WB with similar signal (exposures) at timepoint T0 within the EVctrl and KCTD15 samples would be useful. Otherwise, the difference in stability is not clear (i.e. the percentage of reduction of the protein with time may be similar, overall).

Panel d, instead of siTP53, it would be better to use a siHDAC1, if the mechanism is thorough HDAC1.

Discussion:

1) The authors claim that KCTD15 suppresses CRC progression via increasing protein stability of p53. The final claim is not fully supported by the data presented. It is published that KCTD15 may act through suppression of the HH pathway in other contexts, so it should be made clear that action through p53 is not the only potential mechanism.

The authors themselves admit that p53 mutations commonly occur in approximately 40-50% of CRC (line 441). So, the fact that KCTD15 is downregulated in most of the tumors, regardless of p53 status suggests involvement in other tumor suppressive mechanisms. It is possible that the p53 mechanism and the Hh pathway are somewhat acting separately or in cooperation.

1) The authors claim that KCTD15 expression was significantly downregulated in CRC tissues and was negatively associated with the TNM stage of CRC patients.

While it is clear that KCTD15 expression reduction is significant in CRC datasets, less clear is the relation with TNM stage. Indeed, in Table 1: the authors claim that KCTD15 may participate in the progression of CRC (line 62). What it is readable from the table 1 is that the correlation between K15 and TNM stage suggests that stages I-II have preferentially low K15 levels, while looking at stage II-III, (although the number of samples is low), we do not observe a significant increase in % of samples with K15 reduction compared with samples with high K15 expression. So it is possible that K15 loss plays a more significant role in early stage tumors, while this loss is not so useful in later stages. The authors should elaborate on this. Furthermore, it would be really useful to have in table1 also a correlation between K15 expression and follow-up data such as disease free or 5 years survival.

Minor:

Mistake in line 427: Spiombi et al work on medulloblastoma cells.

Reviewer #3 (Remarks to the Author):

the author found that KCTD15 expression was significantly downregulated in CRC tissues and was negatively associated with the TNM stage of CRC patients. KCTD15 overexpression attenuated cell proliferation in vitro and xenograft tumor growth in vivo, this is interesting, but some problems need further improvement.

1. There is grammatical error in row 51, it should be 'Including ... and cancers'.

2. Since KCTD7 also showed significant difference and seemed to be a good target gene, please demonstrate your reason for choosing KCTD15 but not KCTD7 as the target gene.

3. In this article, the researchers found that KCTD15 played an inhibiting role in CRC. However, in table 1, the data showed patients with lower expression of KCTD15 represented an early stage of cancer, please explain it.
4. Figures of Edu assay seems be weird. EdU and dapi/Hoechst could be incorporated into DNA while EdU incorporated into newly synthesized DNA, dapi/Hoechst incorporated into whole DNA. In this way, the extent of dyed DNA should be same. However, in figure 3b, figure 5c and figure 8e, the extents of nuclear dyed by EdU were smaller than those dyed by dapi/Hoechst.
5. In panel 8 of Fig3c, the representative figure of pLKO-shKCTD15 was not clear enough, please substitute if with a high-resolution one.
6. The histograms in Figure 5a seems the same and generated by same data. These two histograms doesn't match with the representative figures of FACS.
7. Please add the results of apoptosis assays in KCTD15-knockdown cells.
8. Please interpret the method and protocol of RNA stability assay.
9. This article showed a potential relationship between FTO and KCTD15 and FTO could mediate the protein expression of KCTD15. However, the expression change of FTO in CRC and normal tissues and the relationship between FTO and KCTD15 in clinical samples were not clarified.
10. Figure 8b should modified to be easier to understand.
11. Rescue assays should be supplemented.
12. The relationship among FTO, KCTD15 and P53 and their impact in prognosis showed be clarified.

## Reviewers' comments

### Reviewer #1

#### Remarks to the Author:

In the manuscript of Zhang et al., the authors focus on the role of KCTD15 in the progression of colorectal cancer. They refer to the role of demethylase FTO mediated by m6A-YTHDF2 as regulators of KCTD15 mRNA levels in cancer cells. They also suggest that KCTD15 ability to inhibit CRC progression is due to its ability to increase the stability of p53 by acting on its acetylation levels.

The work is extremely interesting and clarifies the potential role of KCTD15 in carcinogenesis. The results shown support the hypotheses made by the authors. There are a few points that should be expanded and clarified to ensure the publication of the manuscript.

**Response: Thank you very much for the overall comments!**

#### Major issues

---

1. I do not understand why the authors do not also use another CRC model system for the KCTD15 methylation and p53 stability analysis experiments. It would be appropriate, to corroborate the hypotheses made, to show some experiments done on HCT116, also on LoVo cells.

**Response: Thanks to your kind suggestions, now we realize that it would be better to add results derived from LoVo cells. Several key experiments that demonstrated the regulation of KCTD15 methylation and p53 stability were additionally carried out in LoVo cells. The results were shown in Figure 6 a-b/d, Figure 7a and Figure 8a-b.**

2. It would be useful to understand whether cells over-expressing KCTD15 or silenced for KCTD15 alter their tumor aggressiveness, through specific experiments such as cell migration experiments. This is because reduced cellular aggressiveness could also support the hypothesis of KCTD15 as a therapeutic target in CRC.

31 **Response:** We totally agree that it would be useful to investigate the role of KCTD15  
32 in CRC by determining if it alters tumor aggressiveness. However, we believe the  
33 reviewer also noted that the main aim of our study was to comprehensively investigate  
34 the role of KCTD15 in CRC growth. Therefore, we further investigate how KCTD15  
35 affected p53, a critical regulator in cancer cell survival.

36 CRC metastasis is a complex topic, we are also afraid that we could not reveal the  
37 mechanisms underlying how KCTD15 affects CRC cell metastasis by merely adding  
38 the migration assay. Please kindly understand that our group prefer to focusing on one  
39 mechanism (CRC cell growth), instead of two (CRC cell growth and metastasis),  
40 keeping the integrity of the present study. In fact, we are investigating KCTD15's role  
41 in CRC aggressiveness, however, we have not obtained a solid conclusion yet. We will  
42 absolutely share these findings in the future.

43 Therefore, we added this point as a limitation, and again thank you the kind  
44 suggestion (lines 381-385).

45  
46 3. The authors also show that alterations in KCTD15 expression levels lead to the  
47 stabilization of p53 through the action of HDAC1. The authors should demonstrate  
48 whether KCTD15 is able to interact directly with p53 or with HDAC1.

49 **Response:** Thanks for your comments.

50 Co-IP assay was performed to investigate the binding between KCTD15 and HDAC1  
51 both in HCT116 and LoVo cells (Figure 8b). The results showed that KCTD15  
52 downregulated HDAC1 protein expression but did not interact with HDAC1.

53 A previous study from Spiombi et al. <sup>1</sup> demonstrated that KCTD15 reduced HDAC1  
54 protein expression without interacting with HDAC1. Given the fact that HDAC1 is a  
55 pivotal regulator of p53 deacetylation <sup>2</sup>, in the present study, we analyzed the protein  
56 levels of HDAC1, total p53 and acetylated-p53 in CRC cells. We found that KCTD15  
57 induced p53 acetylation by decreasing HDAC1 expression (Figure 8).

58 We have to admit that we failed to describe the precise mechanisms explaining the  
59 regulation of KCTD15 on HDAC1. Spiombi et al. <sup>1</sup> demonstated that KCTD15 induced

60 HDAC1 degradation by increasing KCASH2 (KCTD Containing-Cullin Adaptor 2)  
61 expression. KCASH2 interacts with Cullin3 to form a E3 ubiquitin ligase complex,  
62 which can recruit and degrade HDAC1<sup>3</sup>. We added this information in lines 424-428.

63 The major aims of our study are to: 1<sup>st</sup>) explore how KCTD15 affects CRC cell  
64 growth and apoptosis; 2<sup>nd</sup>) whether the abnormal expression of KCTD15 in CRC tissues  
65 is associated with m6A. Honestly, at first, we only determined the effects of KCTD15  
66 on CRC cell apoptosis by performing Annexin V/PI staining. Since p53 is a critical  
67 tumor suppressor, after the group discussion, we decided to analyze p53 expression post  
68 the genetic manipulation of KCTD15, and then we were inspired by Spiombi et al.<sup>1</sup> to  
69 determine the expression of HDAC1.

70 The reason why we did not investigate the interaction between KCTD15 and  
71 KCASH2 in CRC cells is that we plan to perform IP-LC/MS based on high-throughput  
72 proteomics to comprehensively explore if there are other molecules involved in  
73 KCTD15's regulation on HDAC1. As we answered in Question 2, we preferred to not  
74 compressing all research contents into one single study. Please kindly let us summarize  
75 these unresolved questions into our next study.

76 Thank you so much again!

### 78 **Minor issues**

---

80 -  
81 1. Line 274. There is no reference to Figure 2D in the text.

82 **Response:** Here, we detected the expression of KCTD15 in the CRC and para-  
83 cancerous tissues by IHC staining, and we have added the description of Figure 2D in  
84 the text (lines 260-262).

85  
86 2. Line 308 It says "decreased", I guess the authors meant "Increased".

87 **Response:** So sorry for such careless clerical error. We have corrected it (lines 289-  
88 290).

89

90 3. Line 341. It says KCTD16, I guess they meant to write KCTD15.

91 **Response:** So sorry for such careless clerical error. We have corrected it (line 315).

92

93 4. Revise the English, some sentences are difficult to understand.

94 **Response:** We have checked and revised the English of our manuscript thoroughly.

95

96 **References**

97 1. Spiombi, E. et al. KCTD15 inhibits the Hedgehog pathway in Medulloblastoma  
98 cells by increasing protein levels of the oncosuppressor KCASH2. *Oncogenesis*  
99 **8**, 64, (2019).

100 2. Ito, A. et al. MDM2-HDAC1-mediated deacetylation of p53 is required for its  
101 degradation. *The EMBO Journal* **21**, 6236-6245, (2002).

102 3. Canettieri, G. et al. Histone deacetylase and Cullin3-REN(KCTD11) ubiquitin  
103 ligase interplay regulates Hedgehog signalling through Gli acetylation. *Nature*  
104 *Cell Biology* **12**, 132-142, (2010).

105

106



107 **Reviewer #2**

108 **Remarks to the Author:**

109 In this paper, the authors claim that KCTD15 is regulated by demethylase FTO in an  
110 m6A-YTHDF2-dependent manner and exerts a tumor inhibiting role in CRC  
111 progression by increasing p53 stability. The data are interesting and a role for KCTD15  
112 in CRC cells is clearly delineated by the authors. In particular, author's claim that  
113 KCTD15 overexpression attenuated cell proliferation in vitro and xenograft tumor  
114 growth in vivo is convincingly demonstrated. Also, I find convincing the data regarding  
115 how m6A modification affects KCTD15 expression.

116 **Response: Thank you very much for the overall comments!**

117

118

### Major issues

119

120

121 1. Regarding the mechanism of action by KCTD15 which has been proposed,  
122 modulation of p53 by means of HDAC1 may be not the only mechanism responsible  
123 for tumor suppression, being HDAC1 also involved in modulation of the Hh pathway  
124 (by modulating Gli1 acetylation) and other targets, and it seems not fully demonstrated  
125 that p53 stabilization is the only mechanism involved in CRC antitumoral effect. I  
126 would not rule out other effects of KCTD15 on other pathways as well, which may  
127 contribute to the effect shown.

128 **Response: Thank you so much for your comments, please let us explain.**

129 The major aims of our study are to: 1<sup>st</sup>) explore how KCTD15 affects CRC cell  
130 growth and apoptosis; 2<sup>nd</sup>) whether the abnormal expression of KCTD15 in CRC is  
131 associated with m6A.

132 Honestly, at first, we only determined the effects of KCTD15 on CRC cell apoptosis  
133 by performing Annexin V/PI staining. Since p53 is a critical tumor suppressor, after the  
134 group discussion, we decided to analyze p53 expression post the genetic manipulation  
135 of KCTD15, and then we were inspired by Spiombi et al. <sup>1</sup> to investigate HDAC1.  
136 Moreover, we found that neither HDAC1 overexpression nor TP53 inhibition  
137 completely abolished the apoptosis of CRC cells induced by KCTD15, suggesting an

138 involvement of other mechanisms underlying KCTD15's pro-apoptotic function. We  
139 plan to perform high-throughput proteomics to comprehensively explore if there are  
140 other molecules involved in KCTD15's actions in CRC cells. However, we preferred  
141 to not compressing all research contents into one single study. Please kindly let us  
142 summarize these unresolved questions into our next study. We have added this point as  
143 a limitation of our study (lines 436-441).

144 Again, thank you so much!

145

146 2. Some of the figures need improvements, especially with the addition of the  
147 appropriate controls.

148 On this regard, the authors should address the following:

149 2.1 The authors present in **Figure 1** the DEGs. Among them, several hint (panel d and  
150 e), to a role of genes involved in muscle, muscle contraction, cardiomyocytes,  
151 cardiomyopathy. The authors should spend at least a few words discussing these  
152 findings.

153 **Response:** As suggested, we have described the findings from GO and KEGG  
154 enrichment analyses in the Discussion section (lines 244-248 and 362-365).

155

156 2.2 I believe that, before focusing on KCTD15 alone, the authors should spend a few  
157 words elaborating what is known about KCTD7.

158 **Response:** Thanks for the reviewer's comments. We have elaborated on the known  
159 features of KCTD7 in the Discussion section (lines 375-380).

160

161 2.3 Figure 2 Panel d: the authors should show IHC of tumor and the paired non  
162 tumoral tissue, as well, to better evaluate the level of KCTD15 expression.

163 **Response:** As suggested, we additionally detected the expression of KCTD15 in CRC  
164 tumor and the paired non-tumoral tissues by IHC staining, and the results confirmed  
165 the downregulated expression of KCTD15 in cancerous tissues (Figure 2d).

166

167 2.4 Figure 4 Panel e, we should see also Ki67 protein levels in the WBs.

168 **Response:** We additionally analyzed the Ki67 protein levels in CRC cells following  
169 KCTD15 overexpression or knockdown (Figure 4d). The results were consistent with  
170 IHC staining shown in Figure 4e.

171

172 2.5 Figure 5:

173 Panel b: KCTD15 protein should be shown as well.

174 **Response:** Added in Figure 5b as suggested.

175

176 Panel c: is important to add a graph with the actual numbers of tunel positive cells.

177 **Response:** As requested by the reviewer, we have quantified the percentage of TUNEL-  
178 positive cells (Figure 5c).

179

180 Panel d: the quality of the samples and of the staining is low (maybe adding in  
181 supplementary a couple more tumors would be helpful)

182 **Response:** Based on your suggestions, we have re-provided the results of IHC staining  
183 in the revised version (Figure 5d).

184

185 Panel e: is not necessary, can be removed, does not add anything new.

186 **Response:** The Figure 5e has been deleted.

187

188 2.6 Figure 6, panel f: misspelling of the word sequence

189 **Response:** Corrected as suggested!

190

191 2.7 Figure 7 panel d: the protein levels of FTO and YTHDF1 should be shown.

192 **Response:** Added as suggested (Figure 7e).

193

194 2.8 Figure 8:

195 Panel a: K15 protein is missing.

196 **Response:** Added as suggested (Figure 8a).

197

198 Panel b, p53 input is not shown.

199 **Response:** We have rearranged the images (Figure 9a).

200

201 Panel c: to allow a better comparison, densitometry performed on WB with similar  
202 signal (exposures) at timepoint T0 within the EVctrl and KCTD15 samples would be  
203 useful. Otherwise, the difference in stability is not clear (i.e. the percentage of reduction  
204 of the protein with time may be similar, overall).

205 **Response:** As suggested by the reviewer, we have quantified the protein amounts of  
206 p53 using a normalization method with the signal at time point T0 arbitrarily set to  
207 100%. The protein stability of p53 was evaluated by degradation curve in cells exposed  
208 to CHX (Figure 9b). We found that the KCTD15 delayed p53 degradation by  
209 determining the protein half-life of p53.

210

211 Panel d, instead of siTP53, it would be better to use a siHDAC1, if the mechanism is  
212 thorough HDAC1.

213 **Response:** As suggested, we added results derived from the genetic manipulation of  
214 HDAC1 in the revised version. Figure 8c-f showed that HDAC1 upregulation reversed  
215 the alteration caused by KCTD15 in HCT116 cells.

216

### 217 3. Discussion

218 3.1 The authors claim that KCTD15 suppresses CRC progression via increasing  
219 protein stability of p53.

220 The final claim is not fully supported by the data presented. It is published that KCTD15  
221 may act through suppression of the HH pathway in other contexts, so it should be made  
222 clear that action through p53 is not the only potential mechanism.

223 The authors themselves admit that p53 mutations commonly occur in approximately  
224 40-50% of CRC (line 441). So, the fact that KCTD15 is downregulated in most of the

225 tumors, regardless of p53 status suggests involvement in other tumor suppressive  
226 mechanisms. It is possible that the p53 mechanism and the Hh pathway are somewhat  
227 acting separately or in cooperation.

228 **Response:** Thank you so much for reading our manuscript carefully!

229 TP53 mutations occur in approximately 40-50% of CRC <sup>2</sup>, and the mutant TP53 may  
230 encode inactive p53 <sup>3</sup>. HCT116 and LoVo cells with no TP53 mutation were used in  
231 this study to ensure that the endogenous p53 function as an apoptotic inducer. A  
232 previous study from Spiombi et al. <sup>1</sup> demonstrated that KCTD15 reduced HDAC1  
233 protein expression without interacting with HDAC1. Given the fact that HDAC1 is a  
234 pivotal regulator of p53 deacetylation <sup>4</sup>, we here analyzed the protein levels of HDAC1,  
235 total p53 and acetylated-p53 in CRC cells. We found that KCTD15 induced p53  
236 acetylation and decreased HDAC1 expression (Figure 8).

237 The major aims of our study are to: 1<sup>st</sup>) explore how KCTD15 affects CRC cell  
238 growth and apoptosis; 2<sup>nd</sup>) whether the abnormal expression of KCTD15 in CRC is  
239 associated with m6A.

240 Honestly, at first, we only determined the effects of KCTD15 on CRC cell apoptosis  
241 by performing Annexin V/PI staining. Since p53 is a critical tumor suppressor, after the  
242 group discussion, we decided to analyze p53 expression post the genetic manipulation  
243 of KCTD15, and then we were inspired by Spiombi et al. <sup>1</sup> to investigate HDAC1.  
244 Herein, we also found that KCTD15 overexpression enhanced p53 acetylation and  
245 upregulated its expression in a HDAC1 dependent manner. Moreover, neither HDAC1  
246 overexpression nor TP53 inhibition completely abolished the apoptosis of CRC cells  
247 induced by KCTD15, suggesting an involvement of other mechanisms underlying  
248 KCTD15's pro-apoptotic function. We plan to perform high-throughput proteomics to  
249 comprehensively explore if there are other molecules involved in KCTD15's actions in  
250 CRC cells.

251 As we answered in Question 1, we preferred to not compressing all research contents  
252 into one single study. Please kindly let us summarize these unresolved questions into  
253 our next study.

254 Moreover, since we also agree that p53 pathway may not be the only downstream  
255 effector to KCTD15, we believe that our conclusion was exaggerated. We modified the  
256 title and the descriptions in the revised article (lines 1-2, 422-434, and 436-441).

257  
258 3.2 The authors claim that KCTD15 expression was significantly downregulated in  
259 CRC tissues and was negatively associated with the TNM stage of CRC patients.

260 While it is clear that KCTD15 expression reduction is significant in CRC datasets, less  
261 clear is the relation with TNM stage. Indeed, in Table 1: the authors claim that KCTD15  
262 may participate in the progression of CRC (line 62). What it is readable from the table  
263 1 is that the correlation between K15 and TNM stage suggests that stages I-II have  
264 preferentially low K15 levels, while looking at stage III, (although the number of  
265 samples is low), we do not observe a significant increase in % of samples with K15  
266 reduction compared with samples with high K15 expression. So it is possible that K15  
267 loss plays a more significant role in early stage tumors, while this loss is not so useful  
268 in later stages. The authors should elaborate on this. Furthermore, it would be really  
269 useful to have in table 1 also a correlation between K15 expression and follow-up data  
270 such as disease free or 5 years survival.

271 **Response:** We agree with the reviewer that patients from stages I-II have preferentially  
272 low K15 levels.

273 We believe that you have also noted that only 10 patients from stages III were recited  
274 in this study. With the popularization of routine health examination, it is hard to collect  
275 enough samples from patients of late TNM stage. We will continue our study and tried  
276 our best to collect more clinical samples to further reveal whether KCTD15 is related  
277 to the late CRC stage. We have clarified this point in the Discussion section (lines 386-  
278 393).

279 The survival data of patients involved in table 1 are still being collected. Please  
280 kindly understand that we may not be able to add this information, and we will share  
281 these data in the future.

282 To address your concern, we extracted data from online database UALCAN

283 (<http://ualcan.path.uab.edu>). The survival curves below showed that patients with  
284 higher KCTD15 expression had a better prognosis. Although these data suggested a  
285 correlation of between KCTD15 and CRC prognosis, the statistical analysis was not  
286 insignificant. KCTD15 and its family members are the current research emphases of  
287 our group, the clinical data are being collected, we will share these data in the future.

288 Moreover, in order not to lead any misunderstanding to the readers, we discussed  
289 the present findings properly the revised manuscript (lines 393-398).

290

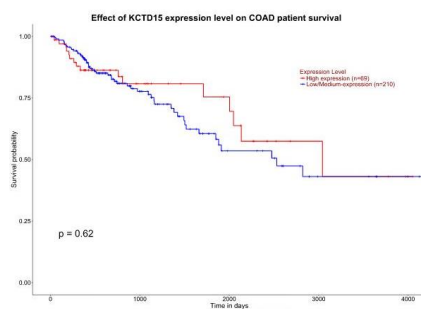

291

292

293

294

295

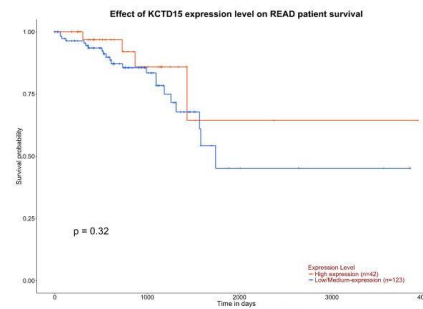

296

297

298 Mistake in line 427: Spiombi et al work on medulloblastoma cells.

299 **Response:** Modified as suggested (lines 424-426). Your careful examination impressed  
300 us a lot, thank you!

### 301 References

302 1 Spiombi, E. et al. KCTD15 inhibits the Hedgehog pathway in Medulloblastoma  
303 cells by increasing protein levels of the oncosuppressor KCASH2. *Oncogenesis*  
304 **8**, 64, doi:10.1038/s41389-019-0175-6 (2019).

305 2 Takayama, T., Miyanishi, K., Hayashi, T., Sato, Y. & Niitsu, Y. Colorectal cancer:  
306 genetics of development and metastasis. *Journal of gastroenterology* **41**, 185-  
307 192, doi:10.1007/s00535-006-1801-6 (2006).

308 3 Wang, Z., Strasser, A. & Kelly, G. L. Should mutant TP53 be targeted for cancer  
309 therapy? *Cell Death Differ* **29**, 911-920, doi:10.1038/s41418-022-00962-9  
310 (2022).

311 4 Ito, A. et al. MDM2-HDAC1-mediated deacetylation of p53 is required for its  
312 degradation. *EMBO J* **21**, 6236-6245 (2002).

313

314

315 **Reviewer #3**

316 **Remarks to the Author:**

317 The author found that KCTD15 expression was significantly downregulated in CRC  
318 tissues and was negatively associated with the TNM stage of CRC patients. KCTD15  
319 overexpression attenuated cell proliferation in vitro and xenograft tumor growth in vivo,  
320 this is interesting, but some problems need further improvement.

321 **Response: Thank you very much for the overall comments!**

322

323

### Major issues

324

325

326 1. There is grammatical error in row 51, it should be ‘Including ... and cancers’.

327 **Response: Corrected as suggested (line 50). Moreover, we checked and corrected the**  
328 **whole manuscript carefully.**

329

330 2. Since KCTD7 also showed significant difference and seemed to be a good target  
331 gene, please demonstrate your reason for choosing KCTD15 but not KCTD7 as the  
332 target gene.

333 **Response: Thanks for the reviewer’s comments.**

334 **Our group are interesting in both KCTD7 and KCTD15. The present study focused**  
335 **on KCTD15, and we will carry our further study regarding to KCTD7. We also**  
336 **discussed the role of KCTD7 in the modified manuscript (lines 373-380).**

337 **According to your suggestion, to highlight KCTD15 in this study, we moved results**  
338 **related to KCTD7 into the supplementary materials (Supplementary Figure 1).**

339

340 3. In this article, the researchers found that KCTD15 played an inhibiting role in CRC.  
341 However, in table 1, the data showed patients with lower expression of KCTD15  
342 represented an early stage of cancer, please explain it.

343 **Response: Thank you very much for pointing this out!**

344 **We believe that you have also noted that only 10 patients from stages III were recited**  
345 **in this study. With the popularization of routine health examination, it is hard to collect**



346 enough samples from patients of late TNM stage. We will continue our study and tried  
347 our best to collect more clinical samples to further reveal whether KCTD15 is related  
348 to the late CRC stage.

349 Moreover, in order not to lead any misunderstanding to the readers, we discussed  
350 the present findings properly the revised manuscript (lines 386-398). Your careful  
351 examination impressed us a lot, thank you!

352

353 4. Figures of Edu assay seems be weird. EdU and dapi/Hoechst could be incorporated  
354 into DNA while EdU incorporated into newly synthesized DNA, dapi/Hoechst  
355 incorporated into whole DNA. In this way, the extent of dyed DNA should be same.  
356 However, in figure 3b, figure 5c and figure 8e, the extents of nuclear dyed by EdU were  
357 smaller than those dyed by dapi/Hoechst.

358 **Response:** Thanks for pointing this out. Based on your kind suggestion, we re-  
359 performed the EdU assay, but the results were consistent with the results presented  
360 earlier. Then we did some survey in this area and found the below information.

361 EdU is a thymidine nucleoside analogue that can replace nucleobase T during cell  
362 proliferation. EdU labeling can accurately label proliferative cells. DAPI is an  
363 embedding agent for DNA containing a specific AT sequence, and it adheres to the  
364 minor groove region of DNA double helix. Therefore, is there a possibility that these  
365 two cannot be totally overlapped? We found some results similar to ours (see red ovals  
366 below).

367 Again, thank you very much for your carefulness. In our future study, we will utilize  
368 Edu kit from multiple manufacturers, and share these findings.

369 1. PMID: 32994691

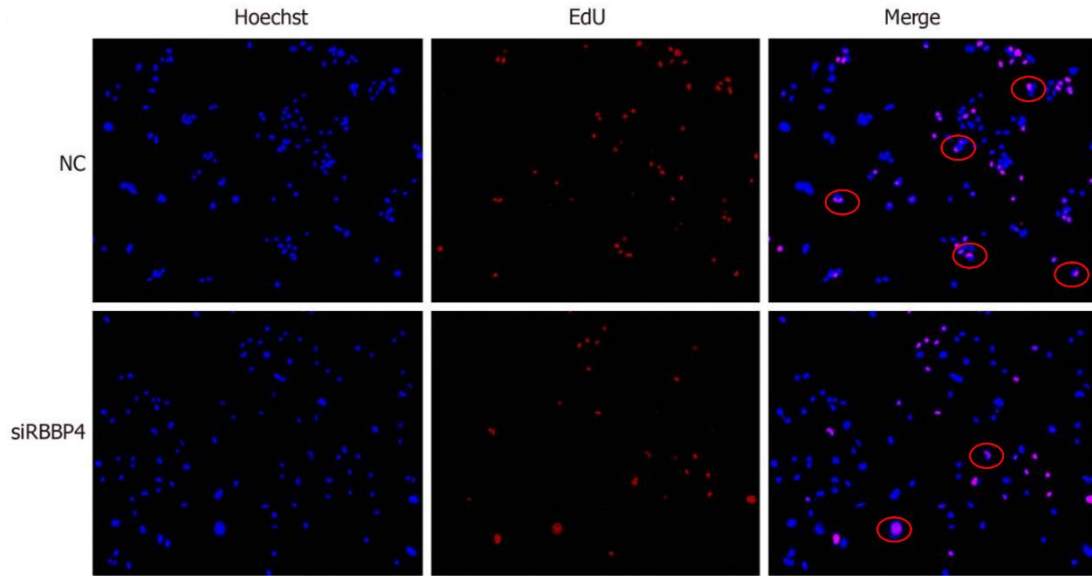

370

371 [2. PMID: 33784010](#)

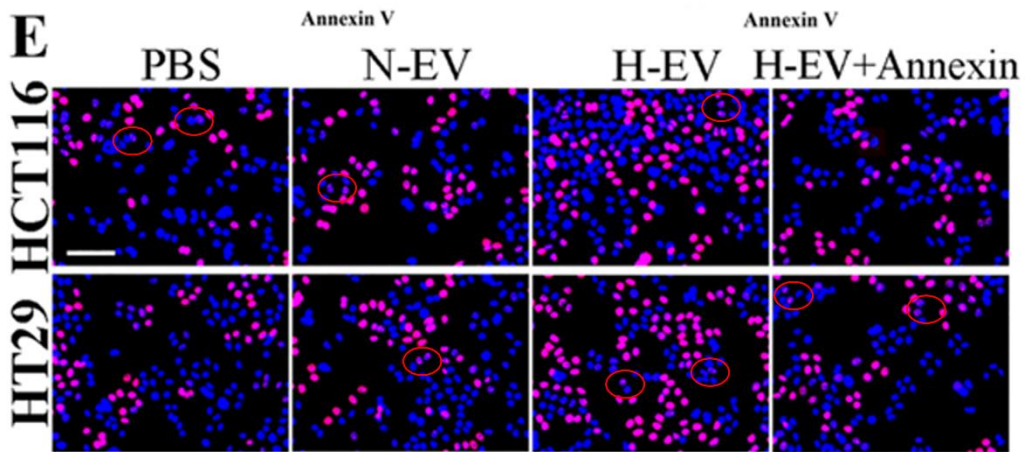

372

373

374 5. In panel 8 of Fig3c, the representative figure of pLKO-shKCTD15 was not clear  
 375 enough, please substitute it with a high-resolution one.

376 **Response:** Replace as suggested in panel 8 of Figure 3c.

377

378 6. The histograms in Figure 5a seems the same and generated by same data. These two  
 379 histograms doesn't match with the representative figures of FACS.

380 **Response:** The histograms showed the mean values from three replicates. To  
 381 demonstrate that the histograms in Fig. 5a are not generated from the same data, we  
 382 provided the original FCS files from three replicates in the supplementary materials.

383 Please see “Original FCS files (for review)”.

384

385 7. Please add the results of apoptosis assays in KCTD15-knockdown cells.

386 **Response:** Thanks for your comments. As suggested, we performed the apoptosis  
387 assays after knocking down KCTD15, and found no significant alteration in cell  
388 apoptosis. The number of apoptotic cells in normal CRC cell population is very small.  
389 Related description was added (lines 285-287).

390

391 8. Please interpret the method and protocol of RNA stability assay.

392 **Response:** Please see lines 143-144.

393

394 9. This article showed a potential relationship between FTO and KCTD15 and FTO  
395 could mediate the protein expression of KCTD15. However, the expression change of  
396 FTO in CRC and normal tissues and the relationship between FTO and KCTD15 in  
397 clinical samples were not clarified.

398 **Response:** We highly appreciate your constructive suggestion!

399 As suggested, we additionally detected the expression of FTO in clinical samples  
400 from CRC patients and used Pearson analysis to analyze whether it was correlated with  
401 KCTD15. We found that their expression was positively correlated (Supplementary  
402 Figure 3;  $r = 0.84$ ;  $P < 0.0001$ ).

403

404 10. Figure 8b should be modified to be easier to understand.

405 **Response:** Modified as suggested (revised Figure 9a).

406

407 11. Rescue assays should be supplemented.

408 **Response:** Added as suggested!

409 In the updated version, we have assessed the effects of simultaneous overexpression  
410 of KCTD15 and HDAC1 on cellular behaviors. The results showed that the forced  
411 expression of HDAC1 partly reversed alterations caused by KCTD15 overexpression

412 (Figure 8c-f).

413

414 12. The relationship among FTO, KCTD15 and P53 and their impact in prognosis  
415 showed be clarified.

416 **Response:** FTO was downregulated in CRC tissues and plays an anti-tumor role in  
417 CRC cells through its m6A demethylase activity <sup>1,2</sup>. p53 is a classical suppressor in  
418 varied cancers, including CRC <sup>3</sup>.

419 Our study revealed the following issues:

420 a. Lower mRNA and protein expression of KCTD15 in the tumor tissues from CRC  
421 patients.

422 b. FTO induced m6A de-methylation, leading to the upregulation of KCTD15.

423 c. KCTD15 inhibited CRC cell growth and induced apoptosis, partly by activating anti-  
424 tumor p53 pathway.

425 We sincerely apologize for not describe their relationship clearly in the original text.

426 We now added more details in the revised version (lines 70-89).

427

#### 428 **References**

429 1 Ruan, D.-Y. et al. FTO downregulation mediated by hypoxia facilitates  
430 colorectal cancer metastasis. *Oncogene* **40**, 5168-5181, doi:10.1038/s41388-  
431 021-01916-0 (2021).

432 2 Relier, S. et al. FTO-mediated cytoplasmic m6Am demethylation adjusts stem-  
433 like properties in colorectal cancer cell. *Nature Communications* **12**, 1716,  
434 doi:10.1038/s41467-021-21758-4 (2021).

435 3 Schulz-Heddergott, R. et al. Therapeutic Ablation of Gain-of-Function Mutant  
436 p53 in Colorectal Cancer Inhibits Stat3-Mediated Tumor Growth and Invasion.  
437 *Cancer Cell* **34**, doi:10.1016/j.ccell.2018.07.004 (2018).

438

439

REVIEWERS' COMMENTS:

Reviewer #1 (Remarks to the Author):

I thank the authors for answering all my suggestions precisely. They carried out new experiments and added the limitations that had emerged.

The work, already very explanatory, has been greatly improved with several new experiments and precise explanations of previous experiments. Congratulations on adding an important piece for the scientific community in clarifying the functional role of the KCTD15 protein.

Reviewer #2 (Remarks to the Author):

I believe the authors addressed most of my concerns, significantly improving their paper, that now is suitable for publication.

Reviewer #3 (Remarks to the Author):

No more comments
