# Supplementary material for: KCTD15 acts as an anti-tumor factor in colorectal cancer cells downstream of the demethylase FTO and the m6A reader YTHDF2
Source: PubMed Central journal article supplement (PMC10912199; doi:10.1038/s42003-024-05880-9), 2024-03-04
Supplement: 42003_2024_5880_MOESM2_ESM.pdf [file 42003_2024_5880_MOESM2_ESM.pdf]

# Supplementary information

## Supplementary Figures

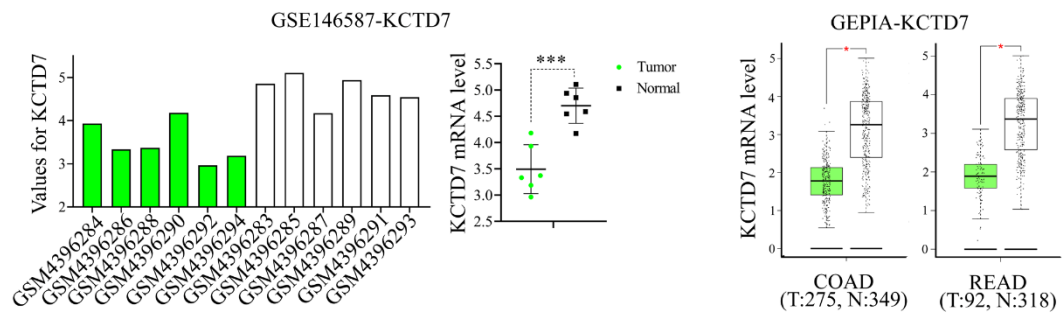

**Supplementary Figure 1** The specific expression values of KCTD7 in the three CRC datasets.

\*P < 0.05 and \*\*\*P < 0.001.

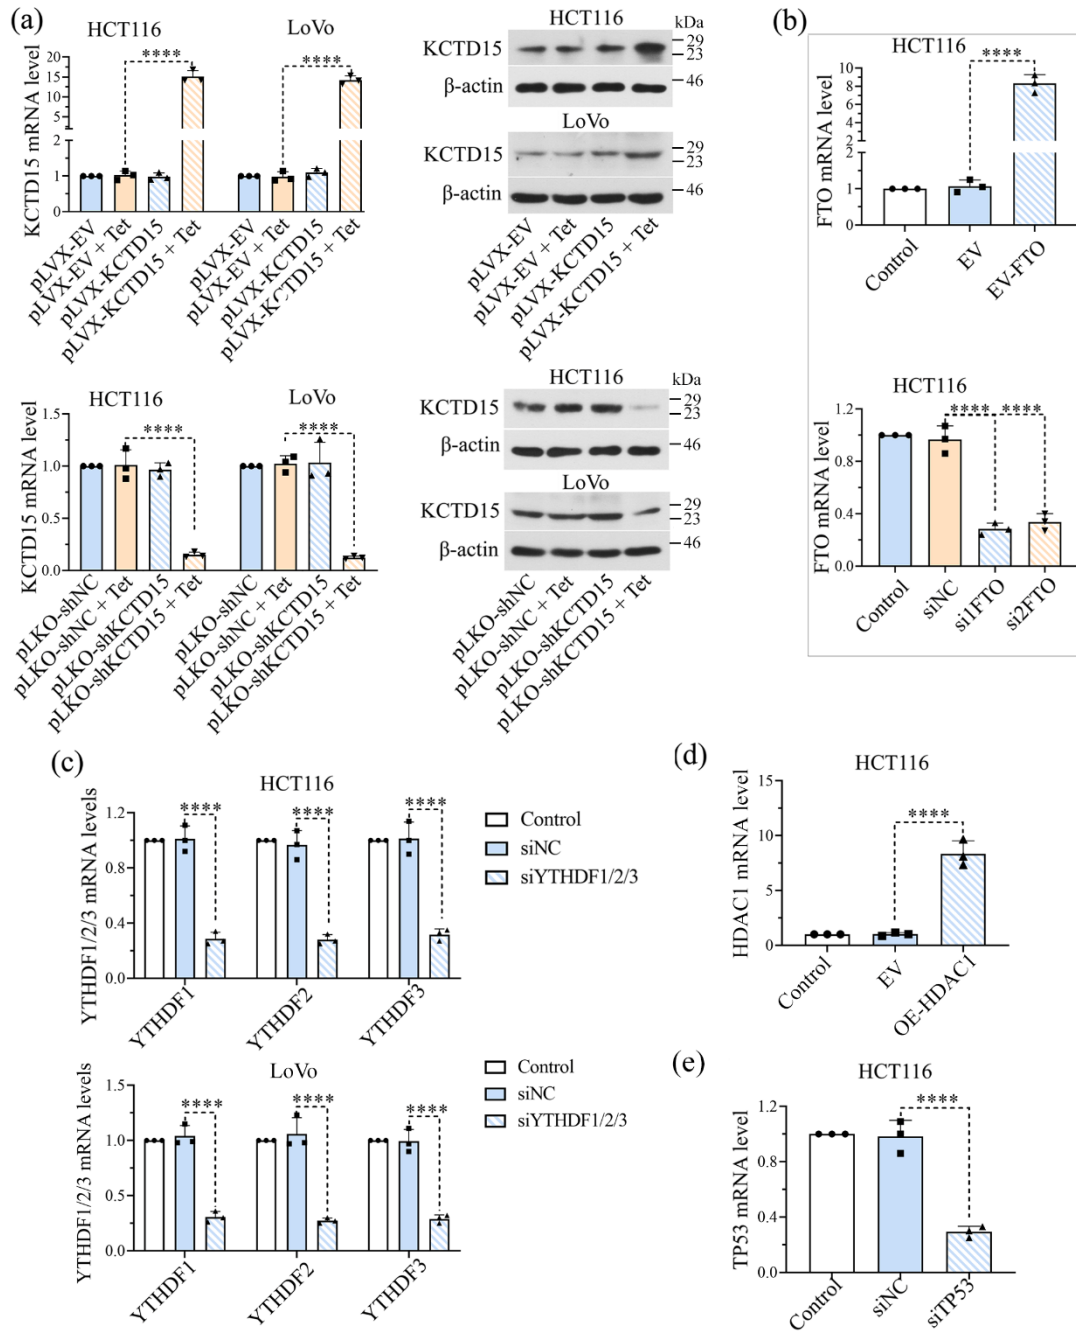

**Supplementary Figure 2 Validation of transfection or infection efficiency. (a)** KCTD15 mRNA expression was verified by qRT-PCR and Western Blot. **(b)** The mRNA expression levels of **(b)** FTO, **(c)** YTHDF1, 2, and 3, **(d)** HDAC1, and **(e)** TP53 were determined by qRT-PCR. \*\*\*\*P < 0.0001. n = 3 per group.

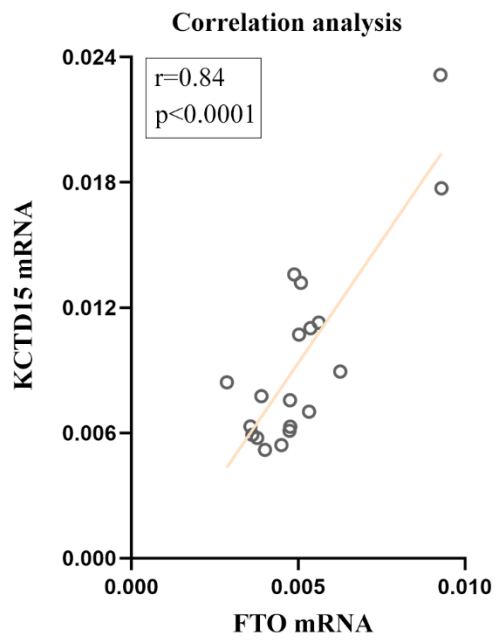

**Supplementary Figure 3 The mRNA expression correlation between FTO and KCTD15 in CRC tissue samples.**

**Figure 3d**

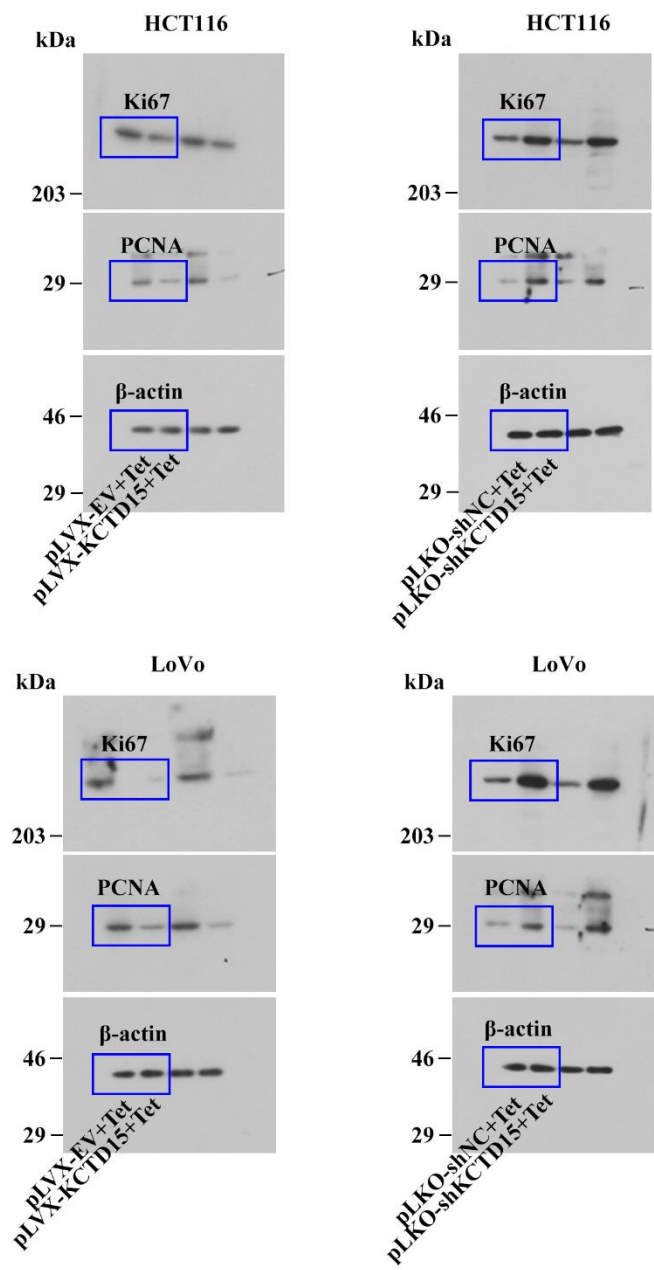

**Supplementary Figure 4 Uncropped blot images in Figure 3.**

Figure 4d

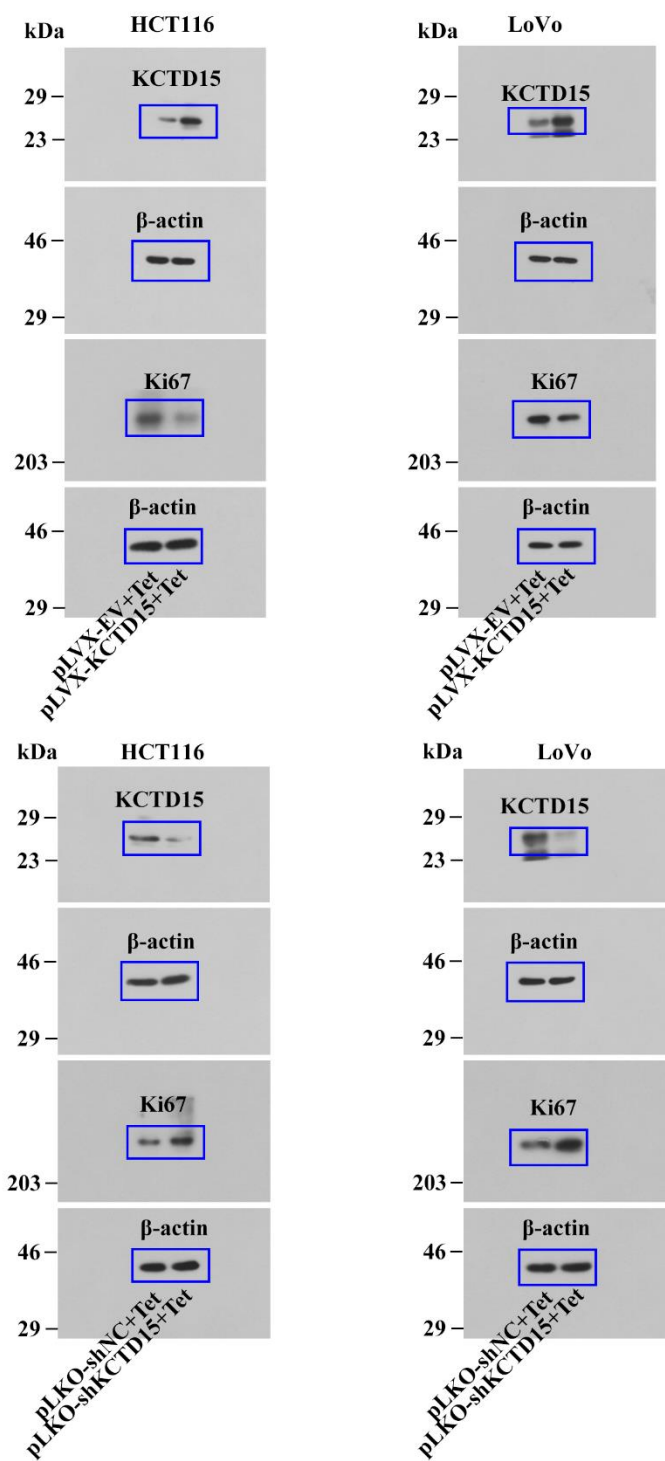

Supplementary Figure 5 Uncropped blot images in Figure 4.

Figure 5b

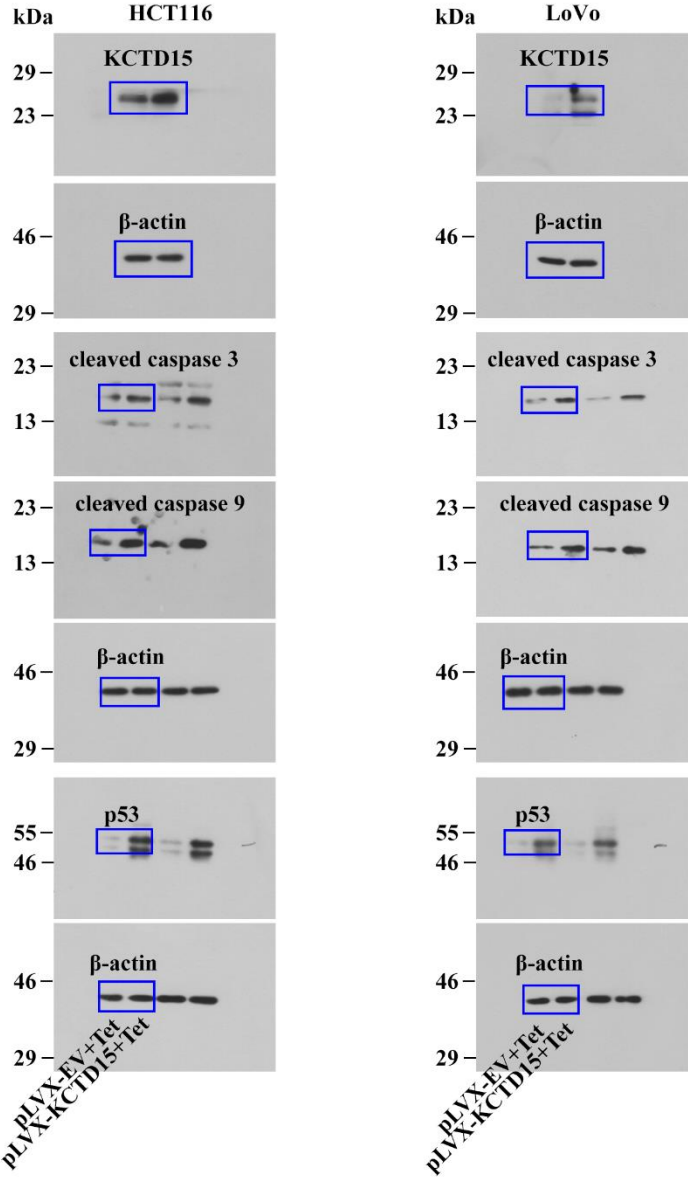

Supplementary Figure 6 Uncropped blot images in Figure 5.

**Figure 7d**

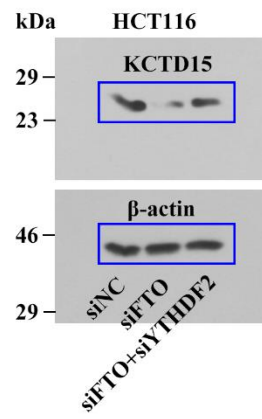

**Figure 7e**

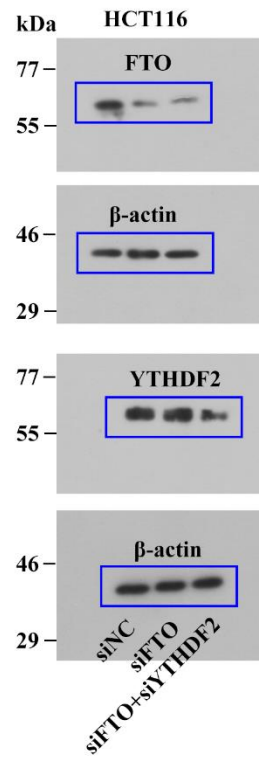

**Supplementary Figure 7 Uncropped blot images in Figure 7.**

**Figure 8a**

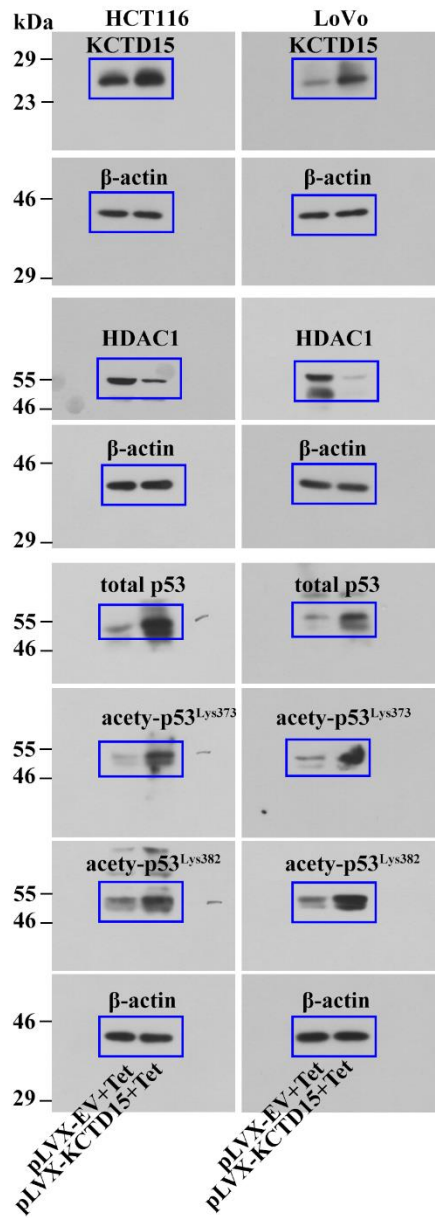

**Figure 8b**

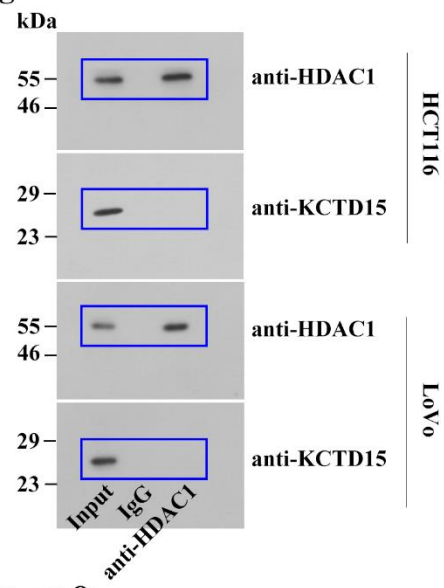

**Figure 8c**

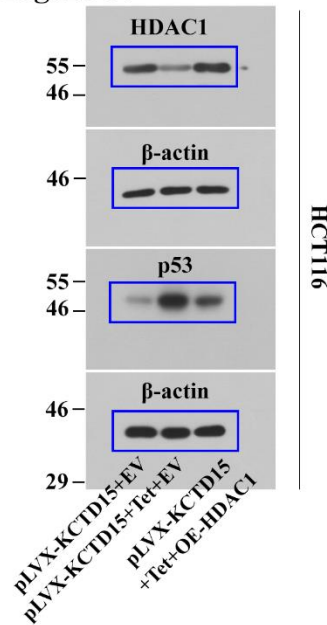

Supplementary Figure 8 Uncropped blot images in Figure 8.



Figure 9a

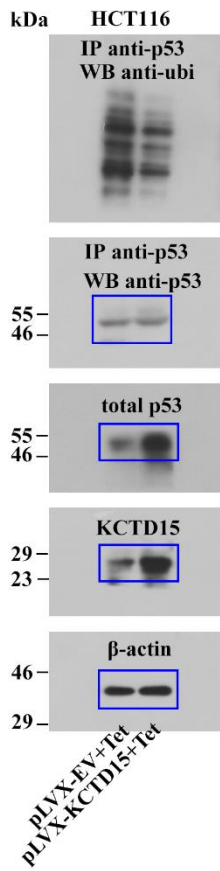

Figure 9b

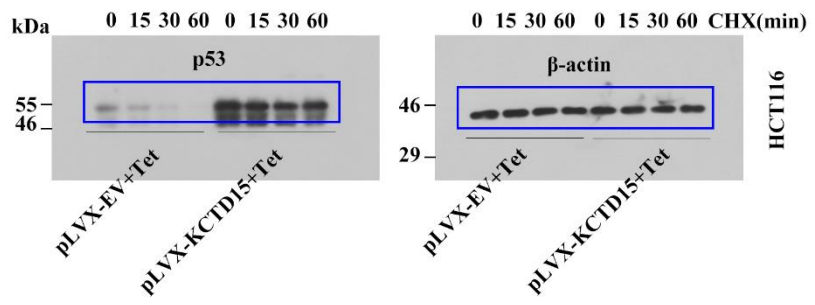

Figure 9g

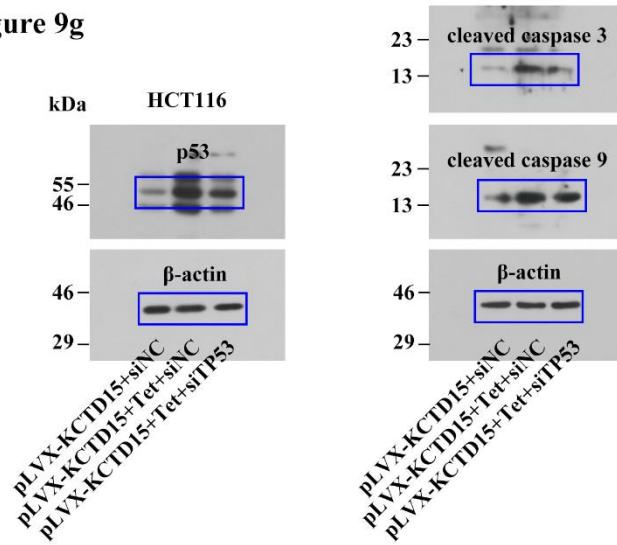

Supplementary Figure 9 Uncropped blot images in Figure 9.

Supplementary Figure 2a

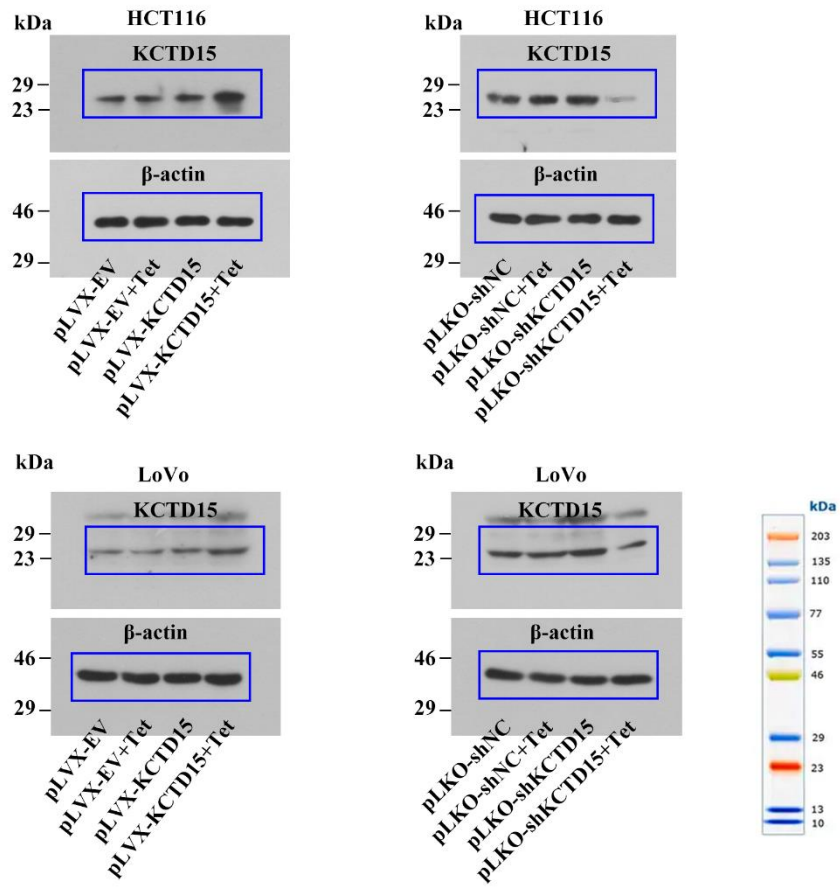

Supplementary Figure 10 Uncropped blot images in Supplementary Figure 2.

## Supplementary Tables

**Supplementary Table. S1** The sequences of shRNA and siRNA.

| Name         | Sequences (5'-3')                            |
|--------------|----------------------------------------------|
| NC shRNA     | Sense TTCTCCGAACGTGTCACGT (Targeting area)   |
| KCTD15 shRNA | Sense GGATAAGCCGCCTCTTCAATG (Targeting area) |
| FTO siRNA-1  | Sense GGUUAGGAUCCAAGGCAAATT                  |
| FTO siRNA-2  | Sense GGAUGACUCUCAUCUCGAATT                  |
| TP53 siRNA   | Sense GCUUCGAGAUGUUCGAGATT                   |
| YTHDF1 siRNA | Sense ACAAGAUAAUAAAGUACAATT                  |
| YTHDF2 siRNA | Sense GCACAGAAGUUGCAAGCAATT                  |
| YTHDF3 siRNA | Sense GGUAUGACUAGCAUUGCAATT                  |
| NC siRNA     | Sense UUCUCCGAACGUGUCACGUTT                  |

**Supplementary Table. S2** The primer sequences for qRT-PCR.

---

| Gene name      | Primer sequences (5'-3')     |
|----------------|------------------------------|
| FTO            | Forward GAACACCAGGCTCTTTACG  |
|                | Reverse ATGAACCCATCCCAACC    |
| KCTD15         | Forward GCGGAGGGAGGAAACAT    |
|                | Reverse TCAGGACGTAGCGGAAAA   |
| YTHDF1         | Forward CAATGAGGCTCCGTGGTC   |
|                | Reverse AAACAGCATCGTGCATAAAA |
| YTHDF2         | Forward TTTGATGTCAGGTGGATTT  |
|                | Reverse TTGGCGTTTCTCATAGTG   |
| YTHDF3         | Forward TCGGTATGCTGGTGTCT    |
|                | Reverse GGCTTCCTCCTCTTCTT    |
| $\beta$ -actin | Forward GGCACCCAGCACAATGAA   |
|                | Reverse TAGAAGCATTGCGGTGG    |
| RIP-KCTD15     | Forward TGCTTCAGTGCCACCT     |
| Primer 1       | Reverse ATCCCACCGCTGTATCTTT  |
| RIP-KCTD15     | Forward TCTTGACCCCTGATTCC    |
| Primer 2       | Reverse CACAGGATGGTGATGGC    |

---

**Supplementary Table. S3** The antibodies information for western blot.

| Primary antibody  | Dilution | Source      | Catalog number |
|-------------------|----------|-------------|----------------|
| KCTD15            | 1:1000   | Proteintech | 20128-1-AP     |
| Ki67              | 1:1000   | Affinity    | AF0198         |
| PCNA              | 1:1000   | Affinity    | AF0239         |
| cleaved caspase-3 | 1:1000   | Affinity    | AF7022         |
| cleaved caspase-9 | 1:1000   | Affinity    | AF5240         |
| p53               | 1:5000   | Proteintech | 60283-2-Ig     |
| FTO               | 1:1000   | ABclonal    | A20992         |
| HDAC1             | 1:1000   | Affinity    | AF6433         |
| acety-p53 Lys373  | 1:5000   | Abcam       | ab62376        |
| acety-p53 Lys382  | 1:1000   | Abcam       | ab75754        |
| $\beta$ -actin    | 1:1000   | Santa cruz  | sc-47778       |

  

| Secondary antibody   | Dilution | Source   | Catalog number |
|----------------------|----------|----------|----------------|
| Goat anti-rabbit IgG | 1:1000   | Beyotime | A0208          |
| Goat anti-mouse IgG  | 1:1000   | Beyotime | A0216          |

**Supplementary Table. S4** The antibodies information for co-immunoprecipitation (co-IP) and ubiquitination assay.

| Primary antibody         | Source      | Catalog number |
|--------------------------|-------------|----------------|
| P53                      | Proteintech | 60283-2-Ig     |
| HDAC1                    | Proteintech | 10197-1-AP     |
| Ubiquitin                | Proteintech | 10201-2-AP     |
| Goat anti-rabbit IgG-HRP | Proteintech | SA00001-2      |
