# Supplementary material for: KCTD15 acts as an anti-tumor factor in colorectal cancer cells downstream of the demethylase FTO and the m6A reader YTHDF2
Source: PubMed Central journal article supplement (PMC10912199; doi:10.1038/s42003-024-05880-9), 2024-03-04
Supplement: 42003_2024_5880_MOESM3_ESM.pdf [file 42003_2024_5880_MOESM3_ESM.pdf]

## **Description of Additional Supplementary Files**

File Name: Supplementary Data 1

Description: The source data for the Figures.
