# Supplementary material for: KCTD15 acts as an anti-tumor factor in colorectal cancer cells downstream of the demethylase FTO and the m6A reader YTHDF2
Source: PubMed Central journal article supplement (PMC10912199; doi:10.1038/s42003-024-05880-9), 2024-03-04
Supplement: 42003_2024_5880_MOESM5_ESM.pdf [file 42003_2024_5880_MOESM5_ESM.pdf]

## Reporting Summary

Nature Portfolio wishes to improve the reproducibility of the work that we publish. This form provides structure for consistency and transparency in reporting. For further information on Nature Portfolio policies, see our [Editorial Policies](#) and the [Editorial Policy Checklist](#).

### Statistics

For all statistical analyses, confirm that the following items are present in the figure legend, table legend, main text, or Methods section.

n/a Confirmed

- The exact sample size ( $n$ ) for each experimental group/condition, given as a discrete number and unit of measurement
- A statement on whether measurements were taken from distinct samples or whether the same sample was measured repeatedly
- The statistical test(s) used AND whether they are one- or two-sided  
*Only common tests should be described solely by name; describe more complex techniques in the Methods section.*
- A description of all covariates tested
- A description of any assumptions or corrections, such as tests of normality and adjustment for multiple comparisons
- A full description of the statistical parameters including central tendency (e.g. means) or other basic estimates (e.g. regression coefficient) AND variation (e.g. standard deviation) or associated estimates of uncertainty (e.g. confidence intervals)
- For null hypothesis testing, the test statistic (e.g.  $F$ ,  $t$ ,  $r$ ) with confidence intervals, effect sizes, degrees of freedom and  $P$  value noted  
*Give  $P$  values as exact values whenever suitable.*
- For Bayesian analysis, information on the choice of priors and Markov chain Monte Carlo settings
- For hierarchical and complex designs, identification of the appropriate level for tests and full reporting of outcomes
- Estimates of effect sizes (e.g. Cohen's  $d$ , Pearson's  $r$ ), indicating how they were calculated

*Our web collection on [statistics for biologists](#) contains articles on many of the points above.*

### Software and code

Policy information about [availability of computer code](#)

**Data collection** A CRC gene expression profile (GSE146587) was downloaded from Gene Expression Omnibus (GEO). Two datasets regarding colon adenocarcinoma (COAD) and rectum adenocarcinoma (READ) from The Cancer Genome Atlas (TCGA) were analyzed via GEPIA.

**Data analysis** GraphPad Prism 8.0.1 (GraphPad Software Inc., San Diego, CA, USA) software.

For manuscripts utilizing custom algorithms or software that are central to the research but not yet described in published literature, software must be made available to editors and reviewers. We strongly encourage code deposition in a community repository (e.g. GitHub). See the Nature Portfolio [guidelines for submitting code & software](#) for further information.

### Data

Policy information about [availability of data](#)

All manuscripts must include a [data availability statement](#). This statement should provide the following information, where applicable:

- Accession codes, unique identifiers, or web links for publicly available datasets
- A description of any restrictions on data availability
- For clinical datasets or third party data, please ensure that the statement adheres to our [policy](#)

The source data underlying the graphs in this study are available at Supplementary Data 1. The uncropped gel images are provided in Supplementary Figures 4-10. All other data are available from the corresponding author on reasonable request.

## Research involving human participants, their data, or biological material

Policy information about studies with [human participants or human data](#). See also policy information about [sex, gender \(identity/presentation\), and sexual orientation](#) and [race, ethnicity and racism](#).

|                                                                    |                                                                                                                                                                                               |
|--------------------------------------------------------------------|-----------------------------------------------------------------------------------------------------------------------------------------------------------------------------------------------|
| Reporting on sex and gender                                        | Specific information on the clinical sample has been provided in Table 1, including statistics on patient gender.                                                                             |
| Reporting on race, ethnicity, or other socially relevant groupings | We don't have related issues.                                                                                                                                                                 |
| Population characteristics                                         | Specific information on the clinical sample has been provided in Table 1.                                                                                                                     |
| Recruitment                                                        | CRC specimens (86 males and 39 females, median age 59.5, range 26-81) and nineteen fresh paired normal and CRC specimens (9 males and 10 females, median age 67, range 56-86) were collected. |
| Ethics oversight                                                   | All experiments were approved by the Ethics Committee of Shengjing Hospital of China Medical University.                                                                                      |

Note that full information on the approval of the study protocol must also be provided in the manuscript.

## Field-specific reporting

Please select the one below that is the best fit for your research. If you are not sure, read the appropriate sections before making your selection.

Life sciences  Behavioural & social sciences  Ecological, evolutionary & environmental sciences

For a reference copy of the document with all sections, see [nature.com/documents/nr-reporting-summary-flat.pdf](https://nature.com/documents/nr-reporting-summary-flat.pdf)

## Life sciences study design

All studies must disclose on these points even when the disclosure is negative.

|                 |                                                                                                                                  |
|-----------------|----------------------------------------------------------------------------------------------------------------------------------|
| Sample size     | mice experiments: sample size = 6; cell experiments: sample size = 3.                                                            |
| Data exclusions | No data were excluded.                                                                                                           |
| Replication     | All experiments were performed at least three times.                                                                             |
| Randomization   | The sample was randomly assigned.                                                                                                |
| Blinding        | Each experiment was associated with proper controls, and compared samples were collected and analyzed under the same conditions. |

## Reporting for specific materials, systems and methods

We require information from authors about some types of materials, experimental systems and methods used in many studies. Here, indicate whether each material, system or method listed is relevant to your study. If you are not sure if a list item applies to your research, read the appropriate section before selecting a response.

### Materials & experimental systems

| n/a                                 | Involved in the study                                           |
|-------------------------------------|-----------------------------------------------------------------|
| <input type="checkbox"/>            | <input checked="" type="checkbox"/> Antibodies                  |
| <input type="checkbox"/>            | <input checked="" type="checkbox"/> Eukaryotic cell lines       |
| <input checked="" type="checkbox"/> | <input type="checkbox"/> Palaeontology and archaeology          |
| <input type="checkbox"/>            | <input checked="" type="checkbox"/> Animals and other organisms |
| <input type="checkbox"/>            | <input checked="" type="checkbox"/> Clinical data               |
| <input checked="" type="checkbox"/> | <input type="checkbox"/> Dual use research of concern           |
| <input checked="" type="checkbox"/> | <input type="checkbox"/> Plants                                 |

### Methods

| n/a                                 | Involved in the study                              |
|-------------------------------------|----------------------------------------------------|
| <input checked="" type="checkbox"/> | <input type="checkbox"/> ChIP-seq                  |
| <input type="checkbox"/>            | <input checked="" type="checkbox"/> Flow cytometry |
| <input checked="" type="checkbox"/> | <input type="checkbox"/> MRI-based neuroimaging    |

## Antibodies

|                 |                                                                                                                                         |
|-----------------|-----------------------------------------------------------------------------------------------------------------------------------------|
| Antibodies used | KCTD15, Proteintech (Catalog number: 20128-1-AP)<br>Ki67, Affinity (Catalog number: AF0198)<br>PCNA, Affinity (Catalog number: AF0239 ) |
|-----------------|-----------------------------------------------------------------------------------------------------------------------------------------|

HDAC1, Affinity (Catalog number:AF6433)  
 cleaved caspase-3, Affinity (Catalog number: AF7022)  
 cleaved caspase-9, Affinity (Catalog number: AF5240)  
 p53, Proteintech (Catalog number: 60283-2-Ig)  
 FTO, ABclonal (Catalog number: A20992)  
 acety-p53 Lys373, Abcam (Catalog number: ab62376)  
 acety-p53 Lys382, Abcam (Catalog number: ab75754)  
 $\beta$ -actin, Santa cruz (Catalog number: sc-47778)

Validation

No validation for commercial antibodies.

## Eukaryotic cell lines

Policy information about [cell lines and Sex and Gender in Research](#)

Cell line source(s)

The CRC cell lines (HCT116 and LoVo) were purchased from iCell (Shanghai, China).

Authentication

STR authentication from the manufacturers.

Mycoplasma contamination

We state that no mycoplasma contamination tests were performed on the cell line.

Commonly misidentified lines  
(See [ICLAC](#) register)

No commonly misidentified lines.

## Animals and other research organisms

Policy information about [studies involving animals; ARRIVE guidelines](#) recommended for reporting animal research, and [Sex and Gender in Research](#)

Laboratory animals

Male BALB/c nude mice were used for this study.

Wild animals

No wild animals were used in this study.

Reporting on sex

No effects of different sex animals on experimental studies.

Field-collected samples

No field-collected samples were used in this study.

Ethics oversight

All animal experimental procedures were approved by Ethical Committee of Shengjing Hospital of China Medical University.

Note that full information on the approval of the study protocol must also be provided in the manuscript.

## Clinical data

Policy information about [clinical studies](#)

All manuscripts should comply with the ICMJE [guidelines for publication of clinical research](#) and a completed [CONSORT checklist](#) must be included with all submissions.

Clinical trial registration

N/A

Study protocol

Cancer and paracancer samples were collected to detect KCDT15 expression.

Data collection

The samples were collected from colorectal cancer patients admitted to Shengjing Hospital of China Medical University.

Outcomes

The expression of KCTD15 was negatively correlated with clinicopathological factors of colorectal cancer.

## Flow Cytometry

### Plots

Confirm that:

- The axis labels state the marker and fluorochrome used (e.g. CD4-FITC).
- The axis scales are clearly visible. Include numbers along axes only for bottom left plot of group (a 'group' is an analysis of identical markers).
- All plots are contour plots with outliers or pseudocolor plots.
- A numerical value for number of cells or percentage (with statistics) is provided.

### Methodology

Sample preparation

Cells were seeded into 6-well plates at density of  $5 \times 10^5$  cells each well. After infection or transfection, cells were harvested

Sample preparation

and washed twice with PBS and resuspended in binding buffer (500  $\mu$ L). Then, cells were stained with Annexin V-FITC (5  $\mu$ L, KeyGEN BioTECH) and PI (5  $\mu$ L, KeyGEN BioTECH) for 10 min in the dark.

Instrument

flow cytometer (Aceabio, San Diego, CA, USA)

Software

FlowJo v10.8.0

Cell population abundance

The proportion of the total number of early apoptotic cells and late apoptotic cells indicates the rate of apoptosis.

Gating strategy

We selected more than 90% of the cell populations as the gating strategy and as the preliminary FSC/SSC gates of the starting cell population.

Tick this box to confirm that a figure exemplifying the gating strategy is provided in the Supplementary Information.
